# Supplementary material for: Mutational Landscape of PI3K-AKT-mTOR Pathway in Breast Cancer: Implications for Targeted Therapeutics
Source: PubMed Central journal article supplement (PMC8176410; doi:10.7150/jca.52993), 2021-05-27
Supplement: jcav12p4408s1.pdf [file jcav12p4408s1.pdf]

## Supporting Information

**Table S1.** The clinicopathological characteristics of 589 women with breast cancer in our cohort

| <b>Characteristics</b>                   |                 | <b>No.(%)</b> |
|------------------------------------------|-----------------|---------------|
| <b>Age</b>                               | >40 years       | 459(77.9%)    |
|                                          | ≤40 years       | 130(22.1%)    |
| <b>Menopausal status</b>                 | Pre-menopausal  | 336(57.0%)    |
|                                          | Post-menopausal | 253(43.0%)    |
| <b>Pathological stage</b>                | I               | 137(23.3%)    |
|                                          | II              | 329(55.9%)    |
|                                          | III             | 123(20.9%)    |
| <b>Pathological tumor (T) stage</b>      | T1              | 228(38.7%)    |
|                                          | T2              | 327(55.5%)    |
|                                          | T3              | 24(4.1%)      |
|                                          | T4              | 10(1.7%)      |
|                                          |                 |               |
| <b>Pathological lymph node (N) stage</b> | N0              | 253(43.0%)    |
|                                          | N1              | 220(37.4%)    |
|                                          | N2              | 82(13.9%)     |
|                                          | N3              | 34(5.8%)      |
| <b>Pathological metastasis (M) stage</b> | M0              | 589(100.0%)   |
|                                          |                 |               |
| <b>Histological grade</b>                | I               | 22(3.7%)      |
|                                          | II              | 274(46.5%)    |
|                                          | III             | 282(47.9%)    |
|                                          | Unknown         | 11(1.9%)      |
| <b>HR/HER2 status</b>                    | HR-/HER2-       | 68(11.5%)     |
|                                          | HR-/HER2+       | 64(10.9%)     |

|                          |           |            |
|--------------------------|-----------|------------|
|                          | HR+/HER2- | 321(54.5%) |
|                          | HR+/HER2+ | 111(18.8%) |
|                          | Unknown   | 25(4.2%)   |
| <b>Histological type</b> | DCIS      | 8(1.4%)    |
|                          | IDC       | 514(87.3%) |
|                          | ILC       | 14(2.4%)   |
| <b>Ki67 status</b>       | Other     | 53(9.0%)   |
|                          | > 14%     | 448(76.1%) |
|                          | ≤ 14%     | 137(23.3%) |
|                          | Unknown   | 4(0.7%)    |

**Abbreviation:** DCIS: ductal carcinoma in situ; HER2: human epidermal growth factor receptor 2; HR: hormone receptor; IDC: invasive ductal carcinoma; ILC: invasive lobular carcinoma

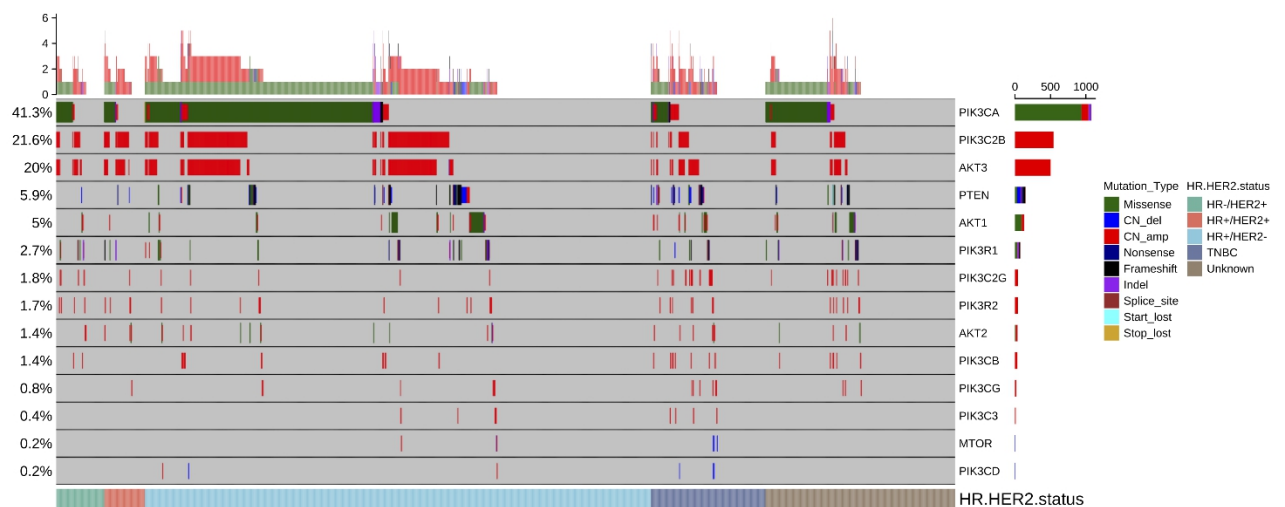

**Figure S1.** Mutation profile of genes in the PI3K-AKT-mTOR pathway of 2,509 breast cancer cohort of the METABRIC dataset. Tumor samples were grouped by molecular subtype: HR+/HER2- (n =1413), HR+/HER2+ (n =113), HER2-rich (n =134), and TNBC (n =320) as indicated by the annotation at the bottom. The mutation frequency for each gene was shown on the left. Colors indicated the mutation types.

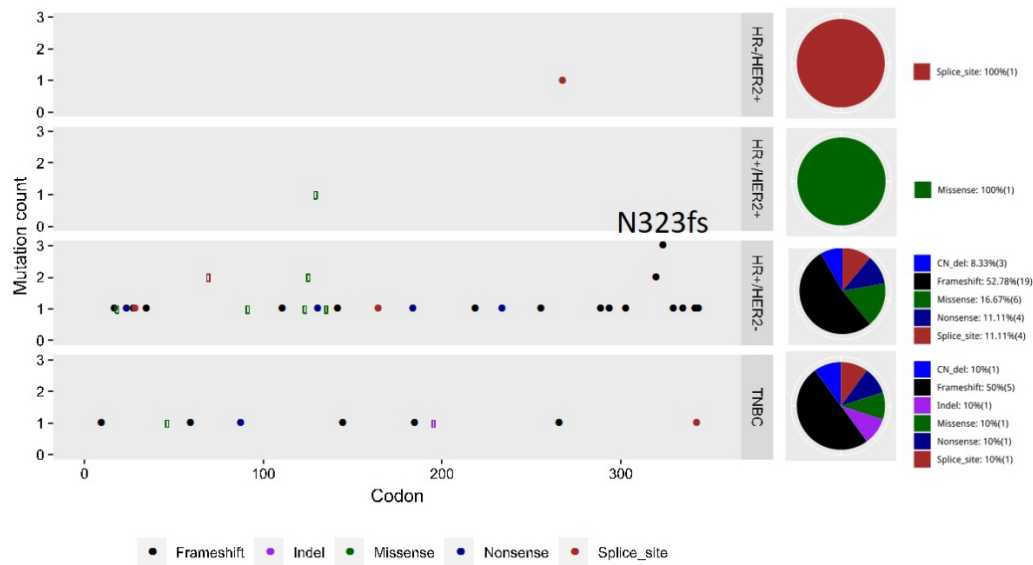

**Figure S2.** Distribution of *PTEN* mutation types in our cohort according to molecular subtypes. The distribution of mutations is according to specific mutation site. Each mutation type is indicated by color. The pie charts on the right summarize the distribution of mutation types for each molecular subtype.

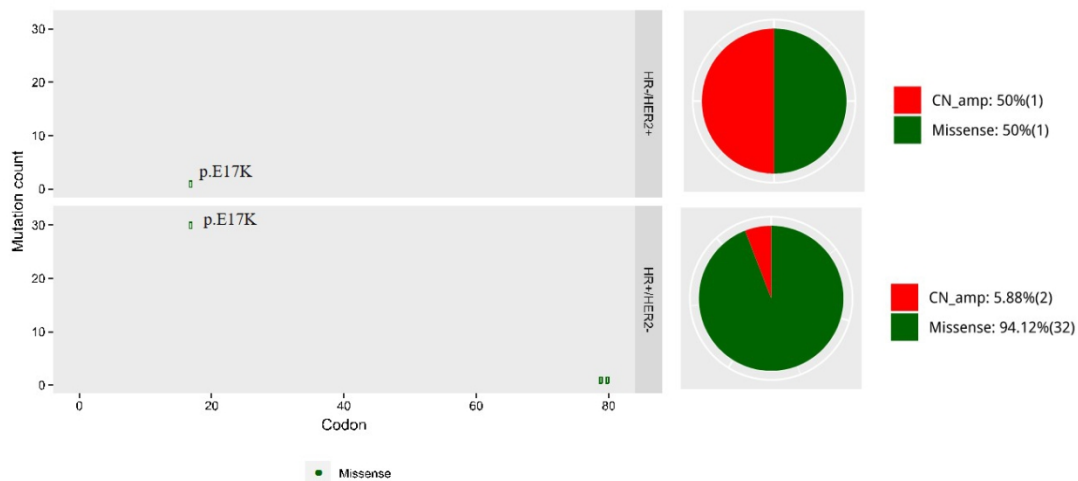

**Figure S3.** Distribution of *AKT1* mutation types in our cohort according to molecular subtypes. The distribution of mutations is according to specific mutation site. Each mutation type is indicated by color. The pie charts on the right summarize the distribution of mutation types for each molecular subtype.

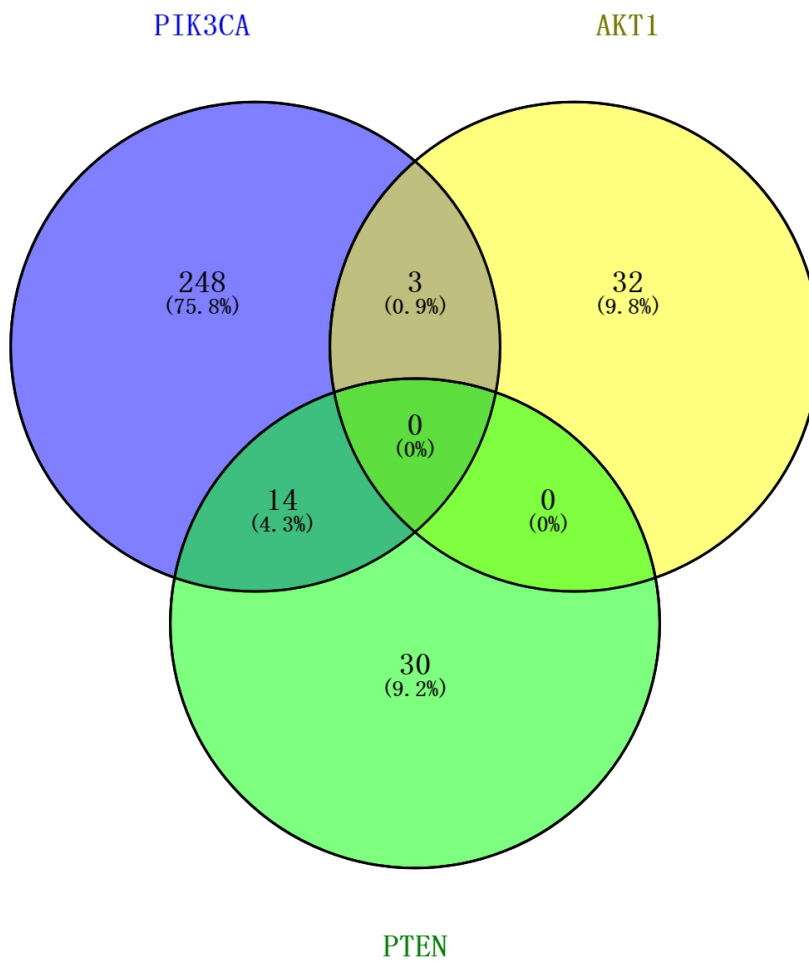

**Figure S4.** The Venn diagram shows the co-occurrence of *PIK3CA*, *PTEN*, and *AKT1* mutations. Of the 265 breast cancer patients with *PIK3CA* mutations, 14 had *PTEN* mutations and 3 had *AKT1* mutations, and the remaining 248 patients had neither *PTEN* mutations nor *AKT1* mutations.
